# Supplementary material for: EWSR1-WT1 Target Genes and Therapeutic Options Identified in a Novel DSRCT In Vitro Model
Source: MDPI journal article supplement (doi:10.3390/cancers13236072), 2021-12-02
Supplement: s1 [file s1]

| Drug        | Plasma concentration (μM) | Reference                                                                   |
|-------------|---------------------------|-----------------------------------------------------------------------------|
| Regorafenib | 8,1                       | Liston & Davis (2017) (Liston & Davis, 2017)                                |
| Birinapant  | 1,0                       | Zhu <i>et al.</i> (2018) (Zhu <i>et al.</i> , 2018)                         |
| Lapatinib   | 4,2                       | Liston & Davis (2017) (Liston & Davis, 2017)                                |
| Navitoclax  | 6,6                       | Wilson <i>et al.</i> (2010) (Wilson <i>et al.</i> , 2010)                   |
| Entrectinib | 4,0                       | Meneses-lorente <i>et al.</i> (2021) (Meneses-Lorente <i>et al.</i> , 2021) |
| Linsitinib  | 6,9                       | Macaulay <i>et al.</i> (2017) (Macaulay <i>et al.</i> , 2017)               |
| Crizotinib  | 0,9                       | Liston & Davis (2017) (Liston & Davis, 2017)                                |
| Dovitinib   | 0,6                       | Kang <i>et al.</i> (2013) (Kang <i>et al.</i> , 2013)                       |
| Ponatinib   | 0,1                       | Liston & Davis (2017) (Liston & Davis, 2017)                                |
| Sorafenib   | 20,1                      | Liston & Davis (2017) (Liston & Davis, 2017)                                |
| Romidepsin  | 0,7                       | Liston & Davis (2017) (Liston & Davis, 2017)                                |
| Vandetanib  | 2,2                       | Liston & Davis (2017) (Liston & Davis, 2017)                                |
| Brigatinib  | 0,9                       | Bedi <i>et al.</i> (2018) (Bedi <i>et al.</i> , 2018)                       |
| Taselisib   | 0,4                       | Juric <i>et al.</i> (2017) (Juric <i>et al.</i> , 2017)                     |
| AT7519      | 1,6                       | Chen <i>et al.</i> (2014) (Chen <i>et al.</i> , 2014)                       |
| Momelotinib | 4,5                       | Zheng <i>et al.</i> (2018) (Zheng <i>et al.</i> , 2018)                     |
| AZD8055     | 0,4                       | Naing <i>et al.</i> (2012) (Naing <i>et al.</i> , 2012)                     |
