# Supplementary material for: EWSR1-WT1 Target Genes and Therapeutic Options Identified in a Novel DSRCT In Vitro Model
Source: MDPI journal article supplement (doi:10.3390/cancers13236072), 2021-12-02
Supplement: s1 [file s1]

|          |                                                                                                                                  |
|----------|----------------------------------------------------------------------------------------------------------------------------------|
| shRNA 2  | FW: CCGGCACAACATGCATCAGAGAAACCTCGAGGTTTCTCTGATGCATGTTGTGTTTT<br>REV: AATTAACCAACATGCATCAGAGAAACCTCGAGGTTTCTCTGATGCATGTTGTG       |
| shRNA 3  | FW: CCGGCAGCAGAGTGAGAAACCATACTCGAGGTATGGTTTCTCACTCTGCTGTTTT<br>REV: AATTAACCAAGCAGAGTGAGAAACCATACTCGAGGTATGGTTTCTCACTCTGCTG      |
| shRNA 4  | FW: CCGGATCAGAGAAACATGACCAAACCTCGAGGTTTGGTCATGTTTCTCTGATTTTT<br>REV: AATTAACCAATCAGAGAAACATGACCAAACCTCGAGGTTTGGTCATGTTTCTCTGAT   |
| shRNA 5  | FW: CCGGGCAGCAGAGTGAGAAACCATACTCGAGTATGGTTTCTCACTCTGCTGTTTT<br>REV: AATTAACCAAGCAGCAGAGTGAGAAACCATACTCGAGTATGGTTTCTCACTCTGCTG    |
| shRNA 6  | FW: CCGGTCTCGTTCAGACCAGCTCAAACCTCGAGTTTGAGCTGGTCTGAACGAGTTTT<br>REV: AATTAACCAATCTCGTTCAGACCAGCTCAAACCTCGAGTTTGAGCTGGTCTGAACGAGA |
| shRNA NT | FW: CCGGATCTCGCTTGGGCGAGAGTAAGCTCGAGCTTACTCTGCCCAAGCGAGTTTT<br>REV: AATTAACCAATCTCGCTTGGGCGAGAGTAAGCTCGAGCTTACTCTGCCCAAGCGAGAT   |
